# Supplementary material for: Histological, Immunohistochemical and Antioxidant Analysis of Skin Wound Healing Influenced by the Topical Application of Brazilian Red Propolis
Source: MDPI journal article supplement (doi:10.3390/antiox11112188), 2022-11-04
Supplement: s1 [file s1]

# Histological, immunohistochemical and antioxidant analysis of skin wound healing influenced by the topical application of brazilian red propolis

## Supplementary materials

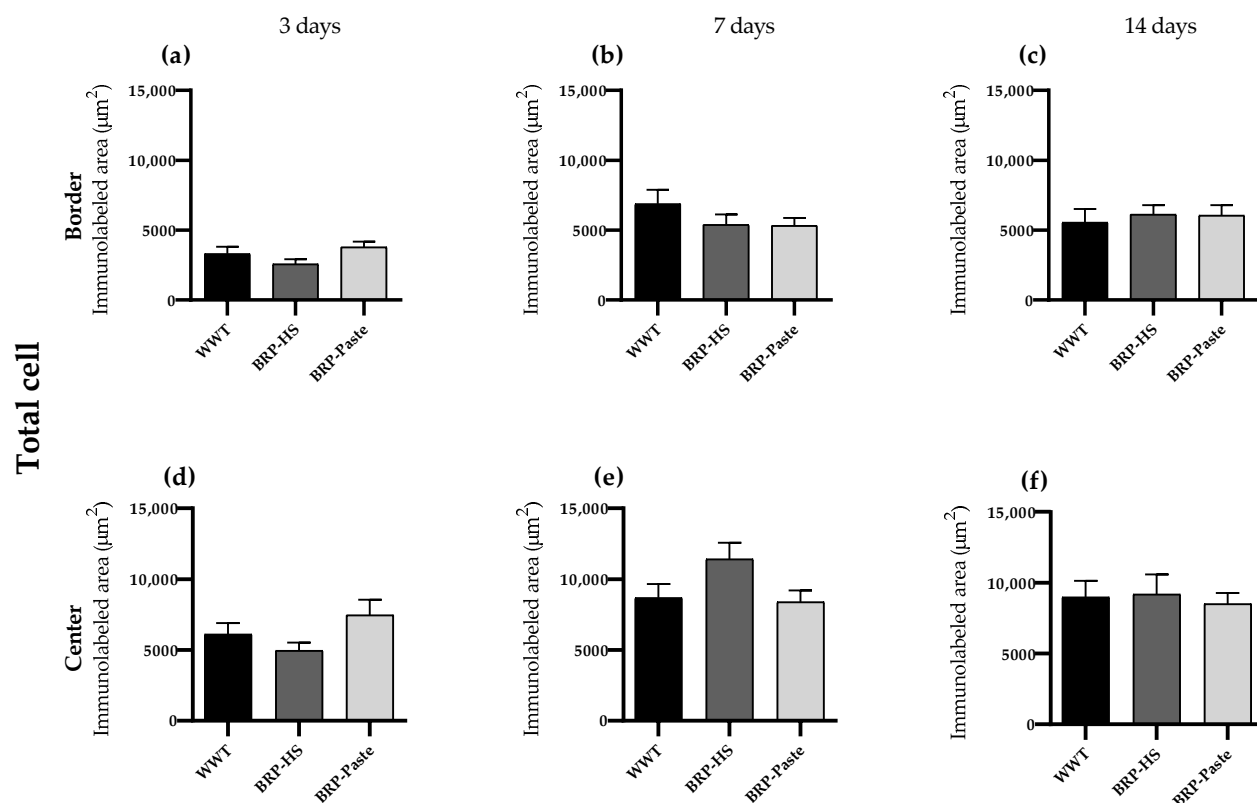

**Figure S1.** Quantification of total cell in HE stained skin samples (dermis) by area ( $\mu\text{m}^2$ ) at border (a, b, c) and central (d, e, f) regions of the wounds in each experimental group for the periods of 3 (a, d), 7 (b, e) and 14 (c, f) days of treatment. No statistical difference compared to the WWT group by one-way ANOVA followed by Newman-Keuls ( $n=6$ ).

## Total cells

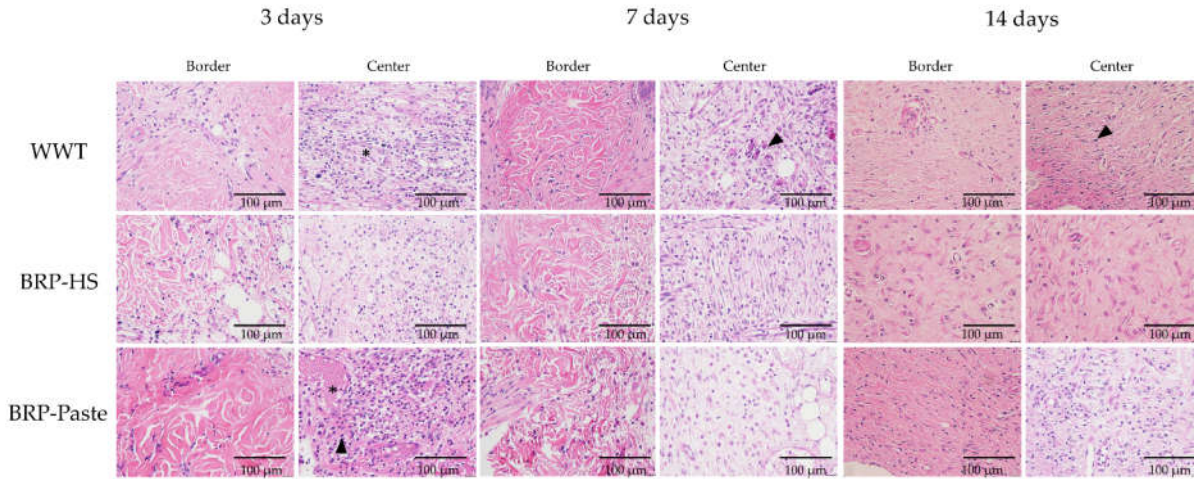

**Figure S2.** Photomicrographs of the dermis (40x), border and central regions of wounds from each experimental group in 3, 7 and 14 days of treatment for total cell count stained in HE. Bars 100  $\mu\text{m}$ . Arrowheads represent nucleus of inflammatory cells. Asterisks shows blood vessels.

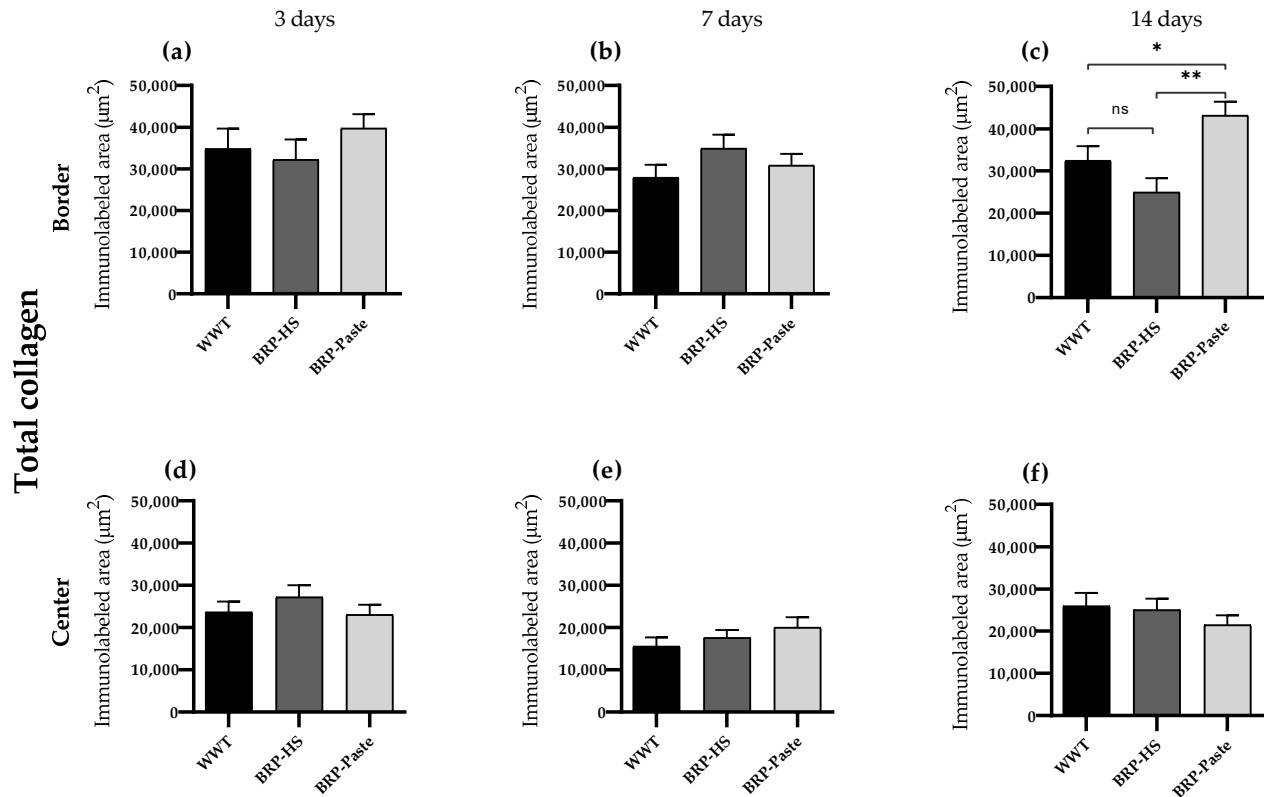

**Figure S3.** Quantification of total collagen in Mallory's trichrome stained skin samples (dermis) by area ( $\mu\text{m}^2$ ) at border (a, b, c) and central (d, e, f) regions of the wounds in each experimental group for the periods of 3 (a, d), 7 (b, e) and 14 (c, f) days of treatment. Statistical difference compared to the WWT group was obtained by one-way ANOVA followed by Newman-Keuls test in which \* $p < 0.05$  and \*\* $p < 0.01$  ( $n=6$ ). ns = no significance.

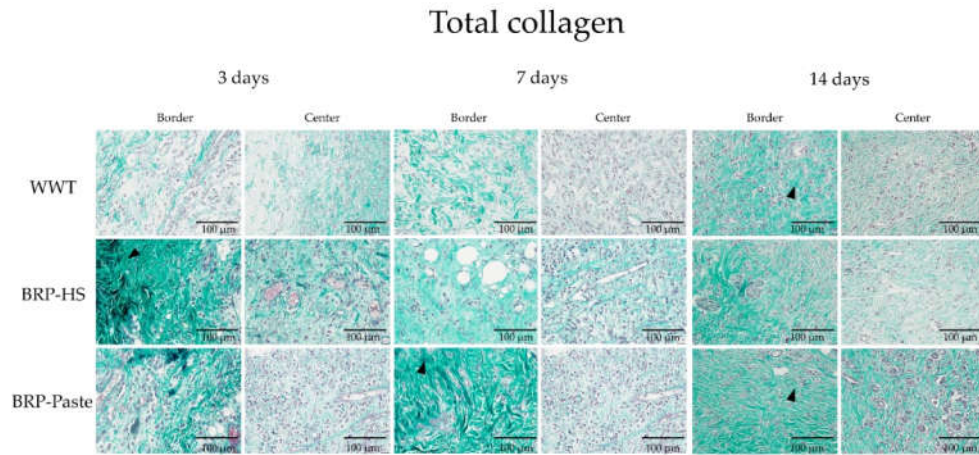

**Figure S4.** Photomicrographs of the dermis (40x), border and central regions of wounds from each experimental group in 3, 7 and 14 days of treatment for total collagen count stained in Mallory's trichrome. Arrowheads indicate collagen fibers. Bars 100  $\mu\text{m}$ .

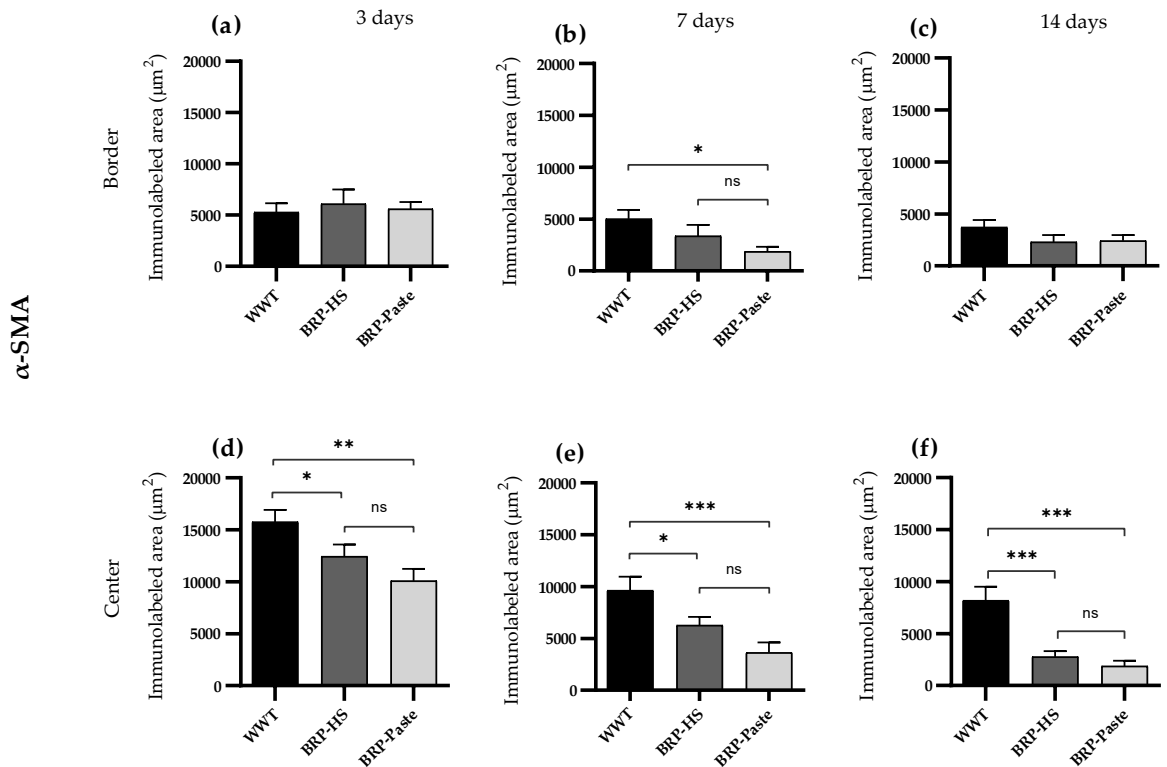

**Figure S5.** Quantification of  $\alpha$ -SMA by area ( $\mu\text{m}^2$ ) at border (a, b, c) and central (d, e, f) regions (dermis) of the wounds in each experimental group for the periods of 3 (a, d), 7 (b, e) and 14 (c, f) days of treatment. Statistical difference compared to the WWT group was obtained by one-way ANOVA followed by Newman-Keuls test in which \* $p < 0.05$ , \*\* $p < 0.01$ , and \*\*\* $p < 0.001$  ( $n=6$ ). ns = no significance.

## $\alpha$ -SMA

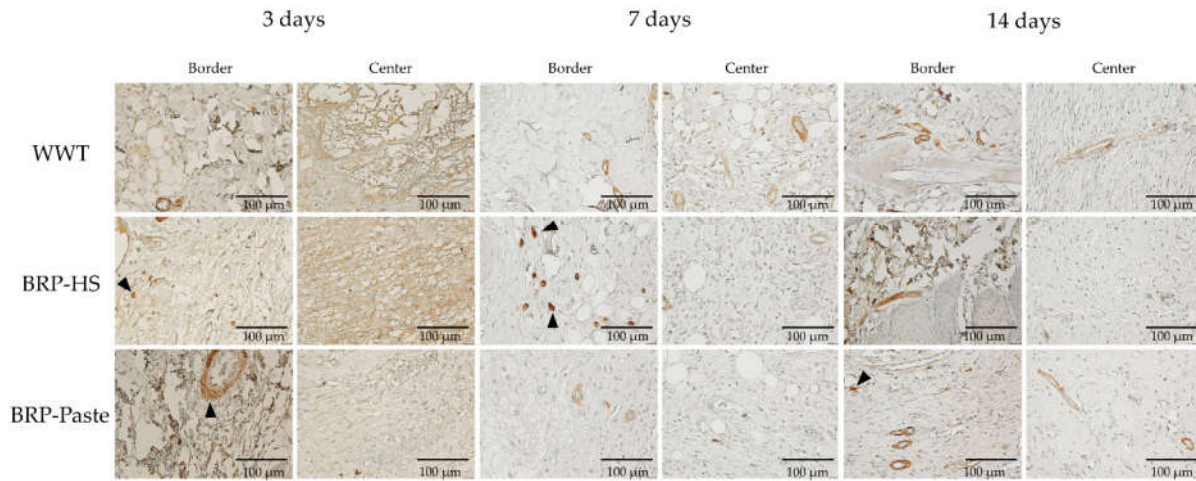

**Figure S6.** Photomicrographs of the dermis (40x), border and central regions of the wound from each experimental group in 3, 7 and 14 days of treatment for  $\alpha$ -SMA immunolabeling.  $\alpha$ -SMA positive cells represented by arrowheads are stained in brown. Bars 100  $\mu$ m.

## Collagen I

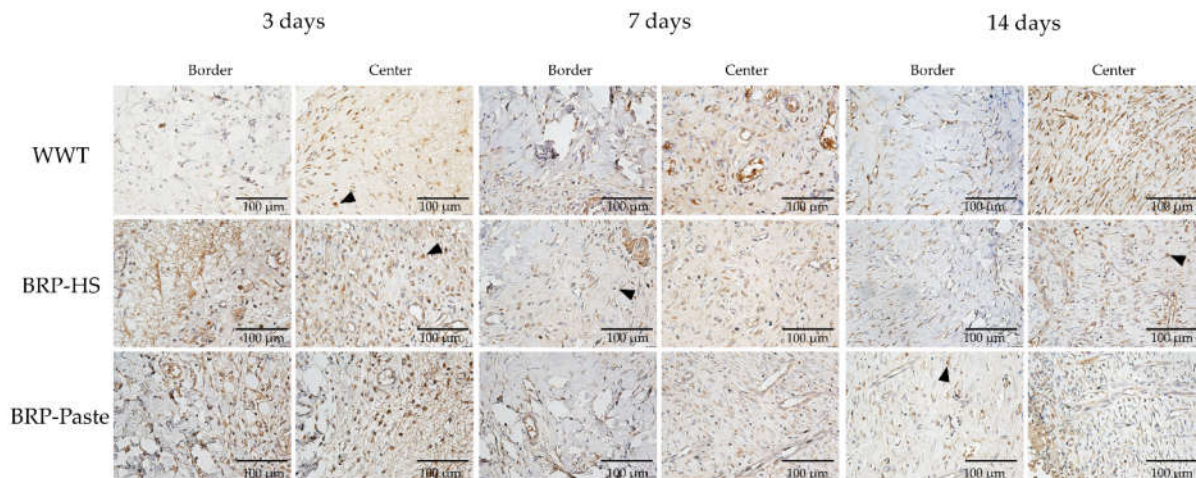

**Figure S7.** Photomicrographs of the dermis (40x), border and central regions of the wound from each experimental group in 3, 7 and 14 days of treatment for collagen type I immunolabeling. Collagen type I positive structures represented by arrowheads are stained in brown. Bars 100  $\mu$ m.



## Collagen III

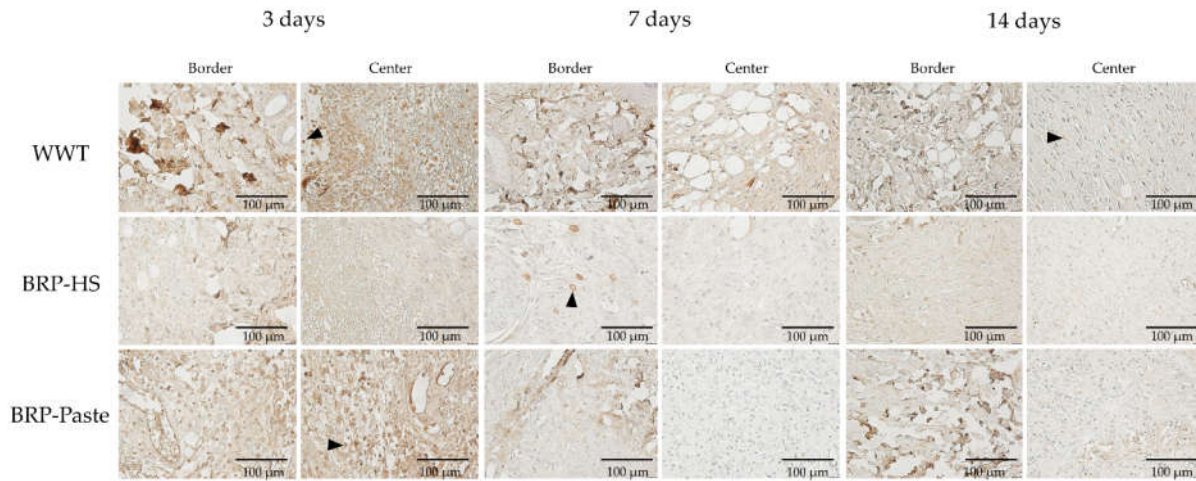

**Figure S8.** Photomicrographs of the dermis (40x), border and central regions of the wound from each experimental group in 3, 7 and 14 days of treatment for collagen type III immunolabeling. Collagen type III positive structures represented by arrowheads are stained in brown. Bars 100 μm.

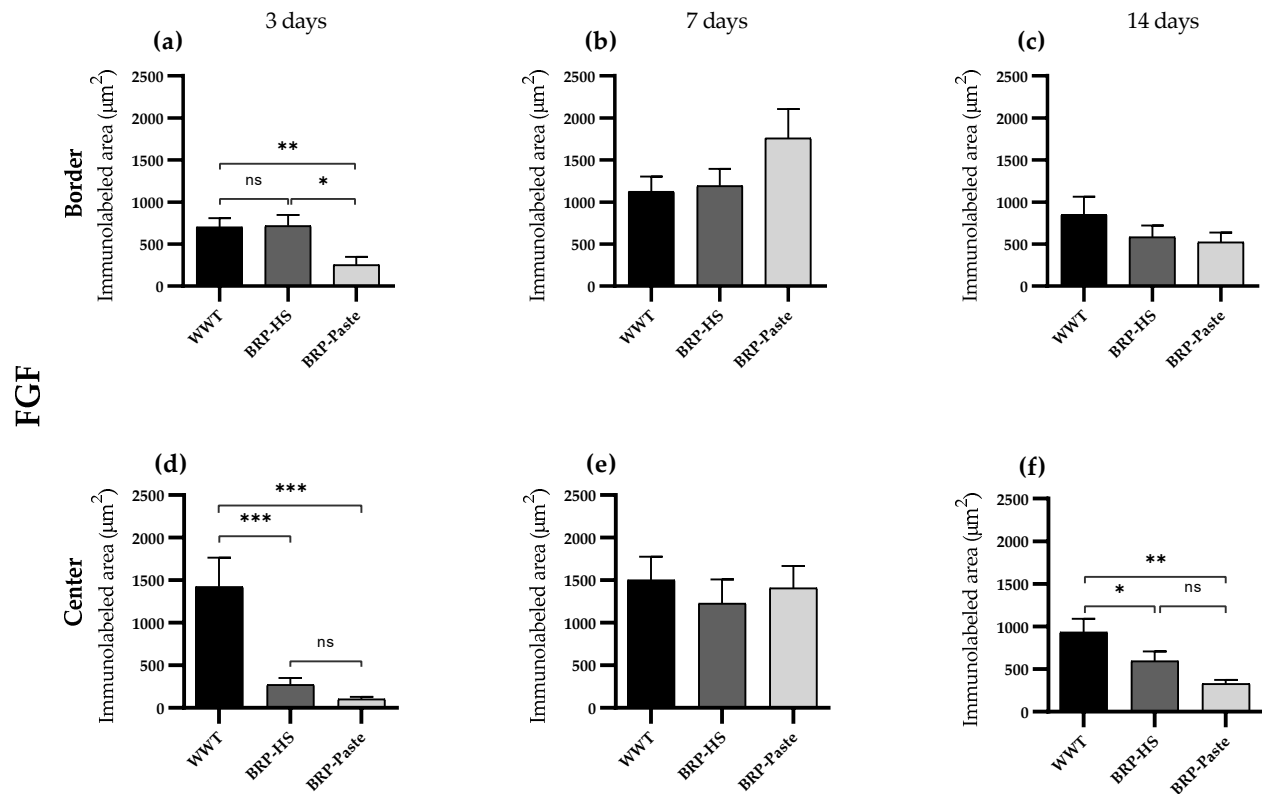

**Figure S9.** Quantification of FGF by area (μm²) at border (a, b, c) and central (d, e, f) regions (dermis) of the wounds in each experimental group for the periods of 3 (a, d), 7 (b, e) and 14 (c, f) days of treatment. Statistical difference compared to the WWT group was obtained by one-way ANOVA

followed by Newman-Keuls test in which \* $p < 0.05$ , \*\* $p < 0.01$ , and \*\*\* $p < 0.001$  ( $n=6$ ). ns = no significance.

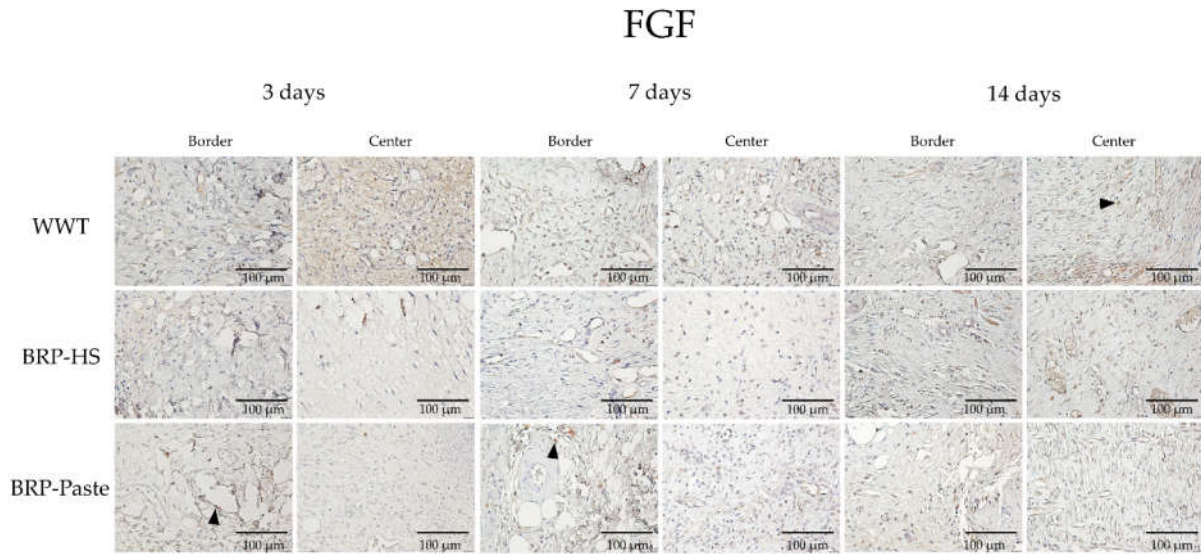

**Figure S10.** Photomicrographs of the dermis (40x), border and central regions of the wound from each experimental group in 3, 7 and 14 days of treatment for FGF immunolabeling. FGF positive cells represented by arrowheads are stained in brown. Bars 100  $\mu\text{m}$ .

Ki67

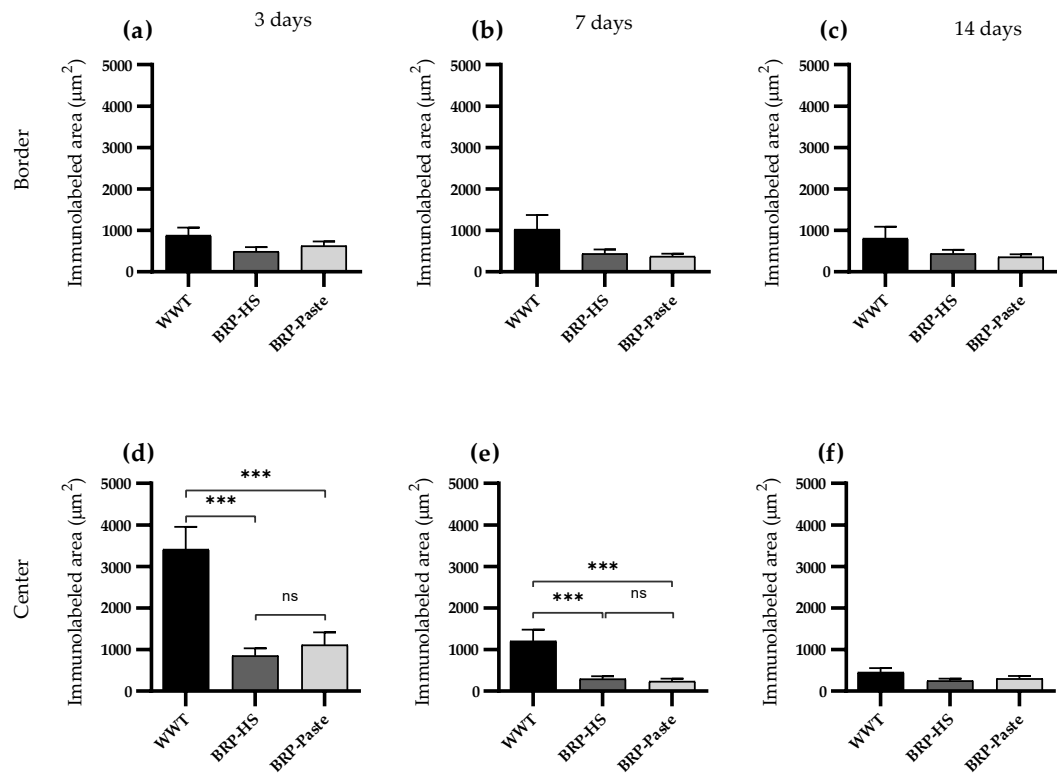

**Figure S11.** Quantification of Ki67 by area ( $\mu\text{m}^2$ ) at border (a, b, c) and central (d, e, f) regions (dermis) of the wounds in each experimental group for the periods of 3 (a, d), 7 (b, e) and 14 (c, f) days

of treatment. Statistical difference compared to the WWT group was obtained by one-way ANOVA followed by Newman-Keuls test in which \*\*\*p < 0.001 (n=6). ns = no significance.

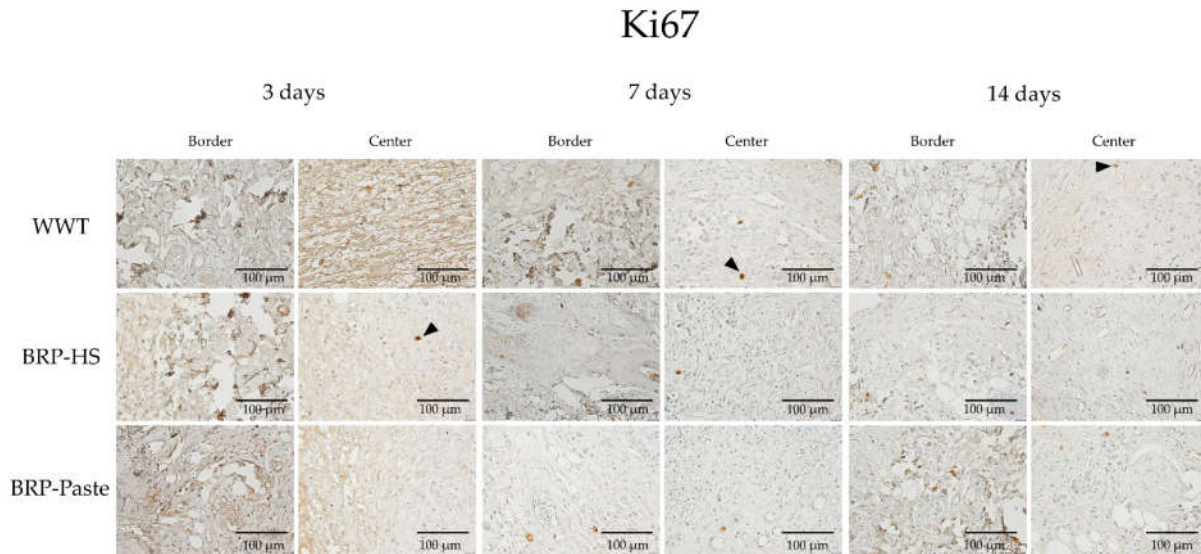

**Figure S12.** Photomicrographs of the dermis (40x), border and central regions of the wound from each experimental group in 3, 7 and 14 days of treatment for Ki67 immunolabeling. Ki67 positive cells represented by arrowheads are stained in brown. Bars 100  $\mu$ m.

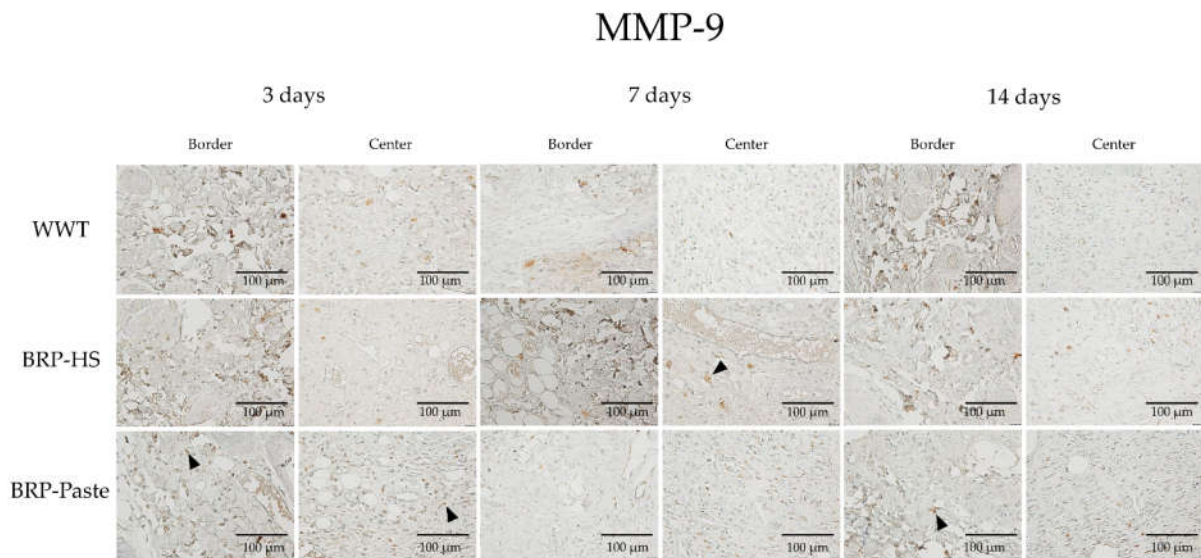

**Figure S13.** Photomicrographs of the dermis (40x), border and central regions of the wound from each experimental group in 3, 7 and 14 days of treatment for MMP-9 immunolabeling. MMP-9 positive cells represented by arrowheads are stained in brown. Bars 100  $\mu$ m.



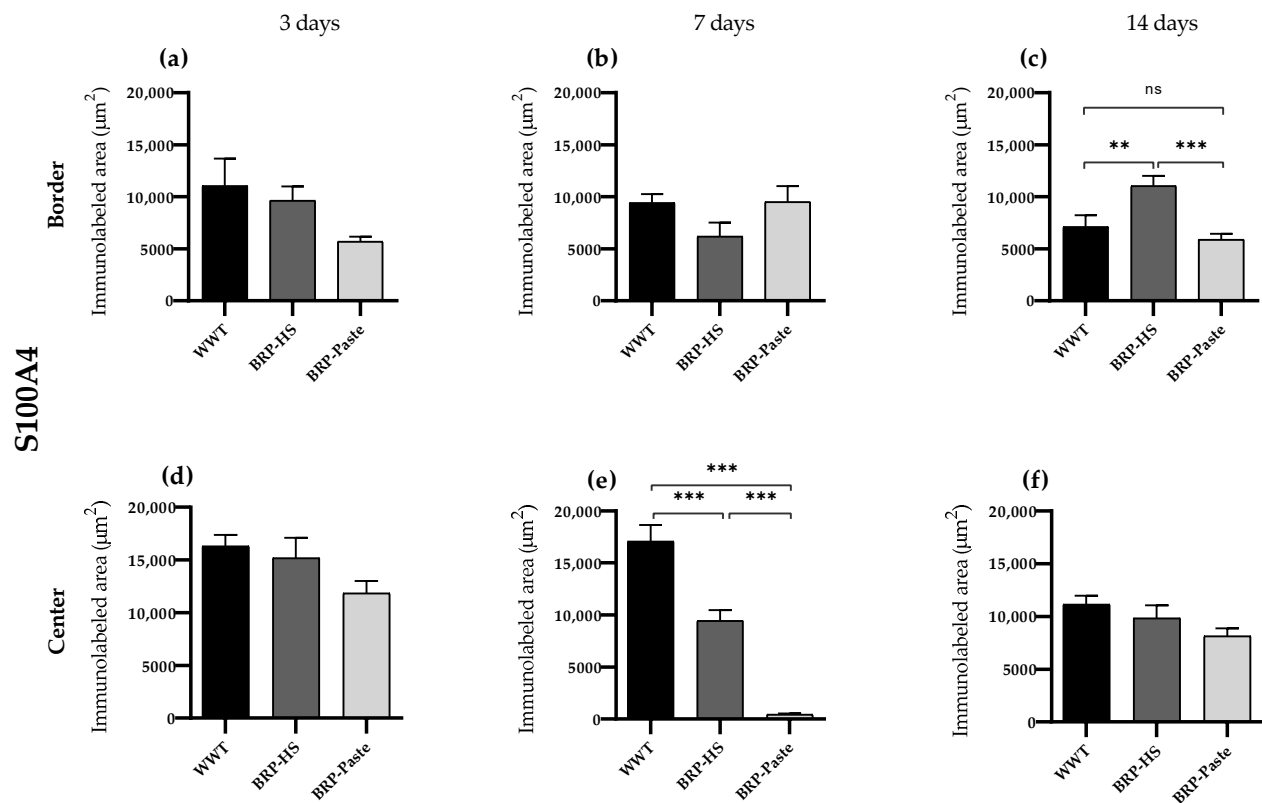

**Figure S14.** Quantification of S100A4 by area ( $\mu\text{m}^2$ ) at border (a, b, c) and central (d, e, f) regions (dermis) of the wounds in each experimental group for the periods of 3 (a, d), 7 (b, e) and 14 (c, f) days of treatment. Statistical difference compared to the WWT group was obtained by one-way ANOVA followed by Newman-Keuls test in which \*\* $p < 0.01$ , and \*\*\* $p < 0.001$  ( $n=6$ ). ns = no significance.

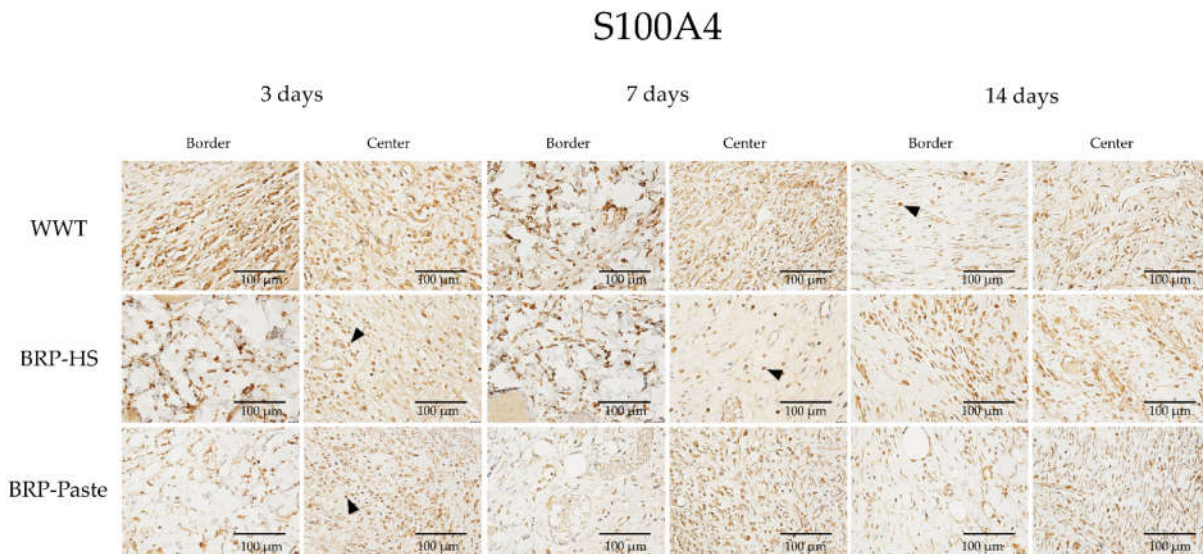

**Figure S15.** Photomicrographs of the dermis (40x), border and central regions of the wound from each experimental group in 3, 7 and 14 days of treatment for S100A4 immunolabeling. S100A4 positive cells represented by arrowheads are stained in brown. Bars 100  $\mu\text{m}$ .



## TGF- $\beta$ 3

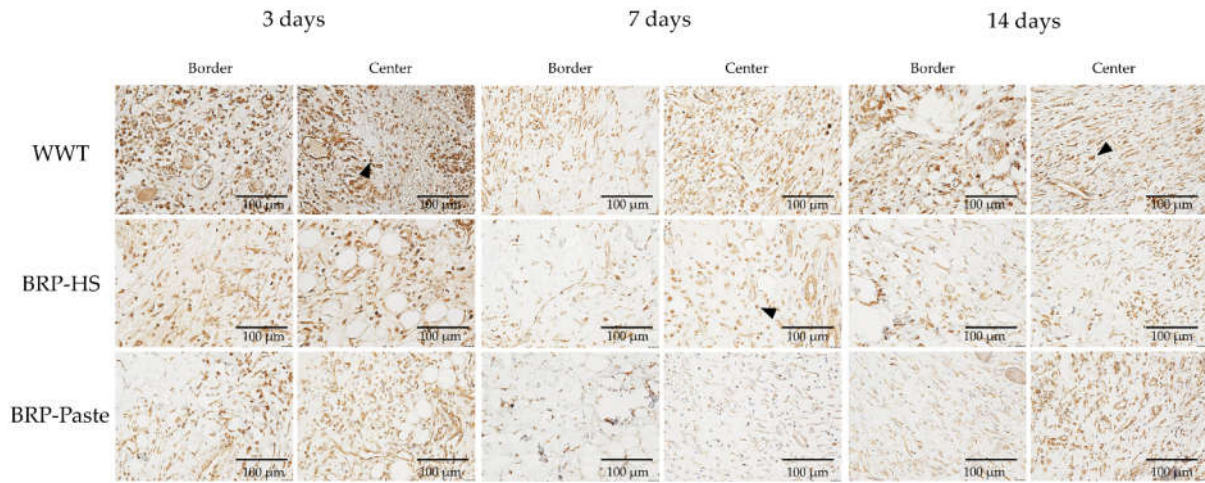

**Figure S16.** Photomicrographs of the dermis (40 $\times$ ), border and central regions of the wound from each experimental group in 3, 7 and 14 days of treatment for TGF- $\beta$ 3 immunolabeling. TGF- $\beta$ 3 positive cells represented by arrowheads are stained in brown. Bars 100  $\mu$ m.
